# Supplementary material
Source: PubMed Central journal article supplement (PMC5709118)
Supplement: 2017.175265.GEELEN_SUPPL.pdf [file 2017.175265.GEELEN_SUPPL.pdf]

**Impact of hospital experience on the quality of tyrosine kinase inhibitor response monitoring and consequence for chronic myeloid leukemia patient survival**

Inge G.P. Geelen,<sup>1</sup> Noortje Thielen,<sup>2,3</sup> Jeroen J.W.M. Janssen,<sup>2</sup> Mels Hoogendoorn,<sup>4</sup> Tanja J.A. Roosma,<sup>2</sup> Sten P. Willemsen,<sup>5,6</sup> Peter J.M. Valk,<sup>7</sup> Otto Visser,<sup>8</sup> Jan J. Cornelissen<sup>7</sup> and Peter E. Westerweel<sup>1</sup>

<sup>1</sup>Department of Hematology, Albert Schweitzer Hospital, Dordrecht; <sup>2</sup>Department of Hematology, VU University Medical Center, Amsterdam; <sup>3</sup>Department of Internal Medicine, Diakonessenhuis, Utrecht; <sup>4</sup>Department of Hematology, Medical Center Leeuwarden; <sup>5</sup>Department of Biostatistics, Albert Schweitzer Hospital, Dordrecht; <sup>6</sup>Department of Biostatistics, Erasmus University Medical Center, Rotterdam; <sup>7</sup>Department of Hematology, Erasmus University Medical Center, Rotterdam and <sup>8</sup>Netherlands Comprehensive Cancer Organisation (IKNL), Utrecht, the Netherlands

Correspondence: [p.e.westerweel@asz.nl](mailto:p.e.westerweel@asz.nl)  
doi:10.3324/haematol.2017.175265

## Supplementary information

### Impact of hospital experience on the quality of tyrosine kinase inhibitor response monitoring and consequence for chronic myeloid leukemia patient survival

Inge G.P. Geelen<sup>1</sup>, Noortje Thielen<sup>2,3</sup>, Jeroen J.W.M. Janssen<sup>2</sup>, Mels Hoogendoorn<sup>4</sup>, Tanja J.A. Roosma<sup>2</sup>, Sten P. Willemsen<sup>5,6</sup>, Peter J.M. Valk<sup>7</sup>, Otto Visser<sup>8</sup>, Jan J. Cornelissen<sup>7</sup> and Peter E. Westerweel<sup>1</sup>

(1) Dep. of Hematology, Albert Schweitzer Hospital, Dordrecht, the Netherlands

(2) Dep. of Hematology, VU University Medical Center, Amsterdam, the Netherlands

(3) Dep. of Internal Medicine, Diaconessenhuis, Utrecht, the Netherlands

(4) Dep. of Hematology, Medical Center Leeuwarden, Leeuwarden, the Netherlands

(5) Dep. of Biostatistics, Albert Schweitzer Hospital, Dordrecht, the Netherlands

(6) Dep. of Biostatistics, Erasmus University Medical Center, Rotterdam, the Netherlands

(7) Netherlands Comprehensive Cancer Organisation (IKNL), Utrecht, the Netherlands

(8) Dep. of Hematology, Erasmus University Medical Center, Rotterdam, the Netherlands

#### Corresponding author:

Dr. Peter E. Westerweel

Department of Interne Medicine / Hematology

Albert Schweitzer Hospital, P.O. Box 444, 3300 AK Dordrecht, The Netherlands

Phone: +31 78-6546464

Fax: +31 78-6523377

E-mail: p.e.westerweel@asz.nl

## **Supplementary methods**

### Statistical analysis

Data are presented as a median with interquartile range (IQR). For baseline comparisons between the three subgroups of hospitals based on experience, chi-square tests and Kruskal-Wallis analysis were used. Overall survival was analyzed using the Kaplan-Meier method, log rank test and a Cox-proportional hazards model. Proportional hazards assumptions were tested. Binary logistic regression modeling was applied to determine predictors of adequate response and mutational assessments performance. The goodness-of-fit of the models was evaluated with the Hosmer-Lemeshow test. A p-value of less than 0.05 was considered significant. All statistical analyses were performed using SPSS version 24 and R-software<sup>1</sup> version 3.2.4.

### **References**

1. Team RC. R: A Language and Environment for Statistical Computing. 2016;.

## Supplementary figures

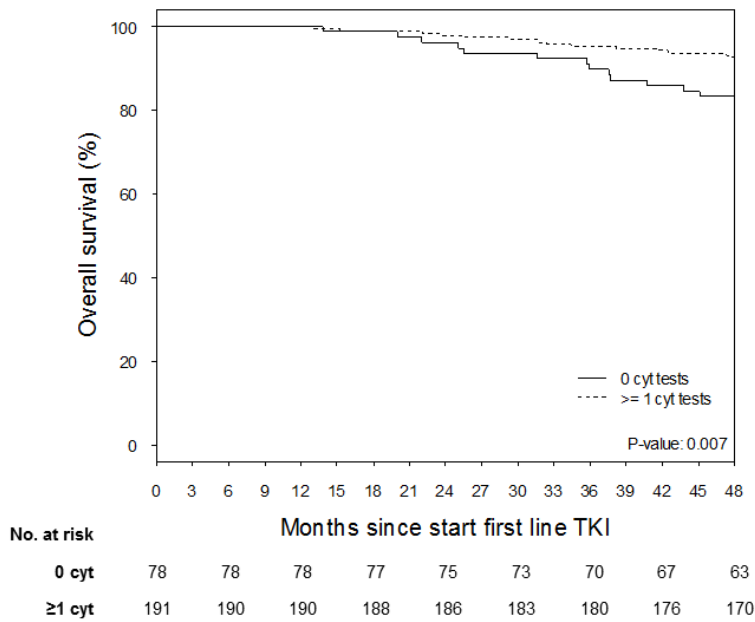

**SI Figure S1.** Kaplan-Meier survival plot of the 1-year landmark analysis of overall survival of patients who underwent no or at least one cytogenetic response assessment in the first year of TKI treatment. The log rank test was used to compare groups.

Abbreviations: cyt tests, cytogenetic response assessments; TKI, tyrosine kinase inhibitor

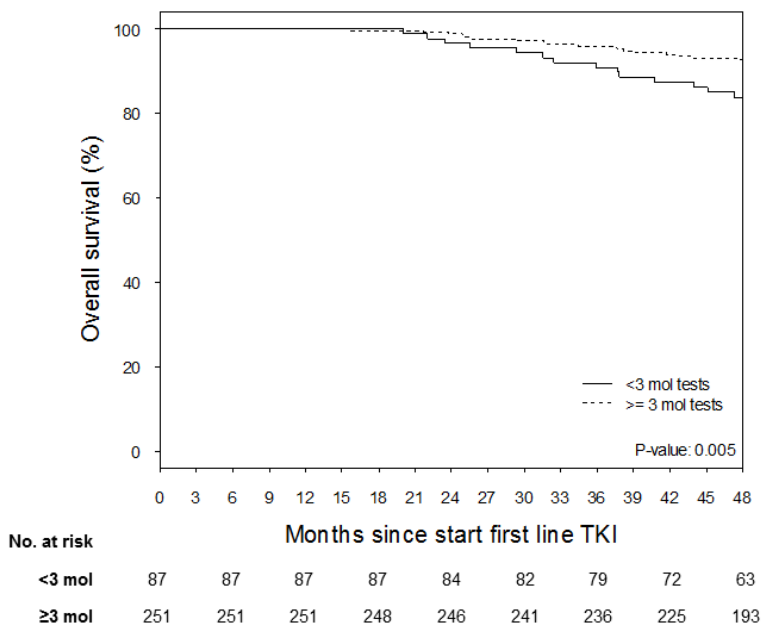

**SI Figure S2.** Kaplan-Meier survival plot of the 1-year landmark analysis of overall survival of patients who underwent less than 3 or at least 3 molecular response assessments in the first year of TKI treatment. The log rank test was used to compare groups.

Abbreviations: mol tests, molecular response assessments; TKI, tyrosine kinase inhibitor

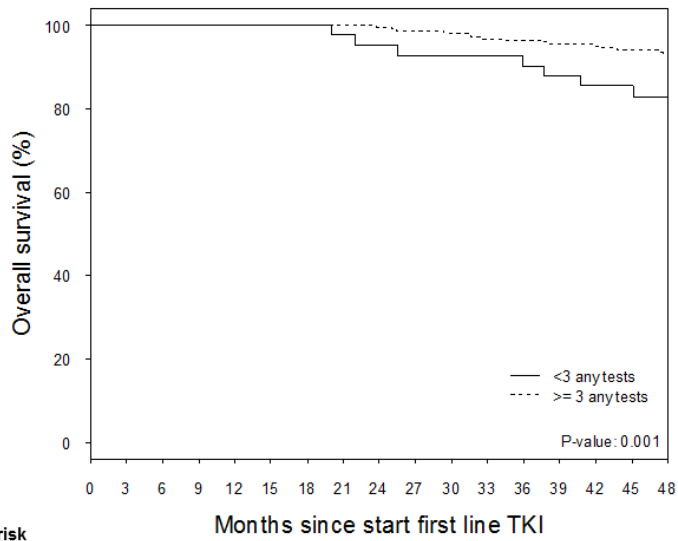

**SI Figure S3.** Kaplan-Meier survival plot of the 1-year landmark analysis of overall survival of patients who underwent less than 3 or at least 3 response assessments of any type in the first year of TKI treatment. The log rank test was used to compare groups.

Abbreviations: any tests, response assessments of any type; TKI, tyrosine kinase inhibitor

## Supplementary Tables

**SI table S1.** Cox proportional hazards model including cytogenetic assessments in first year

|                                                |     | <b>No. of patients</b> | <b>HR (95% CI)</b> | <b>P-value</b> |
|------------------------------------------------|-----|------------------------|--------------------|----------------|
| <b>Age-adjusted Charlson Comorbidity Index</b> |     | 265                    | 1.46 (1.27-1.69)   | <0.001         |
| <b>Hospital experience *</b>                   |     | 265                    | 1.02 (0.91-1.15)   | 0.75           |
| <b>Enrollment in first line clinical trial</b> | no  | 204                    | 1.00               |                |
|                                                | yes | 61                     | 0.78 (0.23-2.65)   | 0.70           |
| <b>Cytogenetic assessments first year</b>      | 0   | 78                     | 1.00               |                |
|                                                | ≥1  | 187                    | 0.58 (0.30-1.10)   | 0.09           |

Hazard ratios on overall survival, derived from the 1-year landmark multivariable cox proportional hazards model

including the variable 'no or at least 1 cytogenetic response assessments underwent in the first year of TKI treatment'

\* Absolute number of treatment initiations per year.

Abbreviations: TKI, tyrosine kinase inhibitor; HR, hazard ratio

**SI table S2.** Cox proportional hazards model including molecular assessments in first year

|                                                |     | <b>No. of patients</b> | <b>HR (95% CI)</b> | <b>P-value</b> |
|------------------------------------------------|-----|------------------------|--------------------|----------------|
| <b>Age-adjusted Charlson Comorbidity Index</b> |     | 333                    | 1.39 (1.20-1.59)   | <0.001         |
| <b>Hospital experience *</b>                   |     | 333                    | 1.06 (0.94-1.19)   | 0.36           |
| <b>Enrollment in first line clinical trial</b> | no  | 269                    | 1.00               |                |
|                                                | yes | 64                     | 0.60 (0.18-1.98)   | 0.41           |
| <b>Molecular assessments first year</b>        | <3  | 85                     | 1.00               |                |
|                                                | ≥3  | 248                    | 0.52 (0.27-1.00)   | 0.05           |

Hazard ratios on overall survival, derived from the 1-year landmark multivariable cox proportional hazards model including the variable 'less than 3 or at least 3 molecular response assessments underwent in the first year of TKI treatment'

\* Absolute number of treatment initiations per year.

Abbreviations: TKI, tyrosine kinase inhibitor

**SI table S3.** Cox proportional hazards model including any type of assessments in first year

|                                                |     | <b>No. of patients</b> | <b>HR (95% CI)</b> | <b>P-value</b> |
|------------------------------------------------|-----|------------------------|--------------------|----------------|
| <b>Age-adjusted Charlson Comorbidity Index</b> |     | 256                    | 1.45 (1.24-1.70)   | <0.001         |
| <b>Hospital experience *</b>                   |     | 256                    | 1.05 (0.92-1.21)   | 0.45           |
| <b>Enrollment in first line clinical trial</b> | no  | 195                    | 1.00               |                |
|                                                | yes | 61                     | 0.79 (0.22-2.83)   | 0.72           |
| <b>Assessments of any type first year</b>      | <3  | 40                     | 1.00               |                |
|                                                | ≥3  | 216                    | 0.50 (0.23-1.08)   | 0.08           |

Hazard ratios on overall survival, derived from the 1-year landmark multivariable cox proportional hazards model

including the variable 'less than 3 or at least 3 response assessments of any type underwent in the first year of TKI treatment'

\* Absolute number of treatment initiations per year.

Abbreviations: TKI, tyrosine kinase inhibitor; HR, hazard ratio
